# Supplementary material
Source: PubMed Central journal article supplement (PMC3242658)
Supplement: mt2011176x10.pdf [file mt2011176x10.pdf]

| <b>Scale</b> | <b>Description</b> | <b>Definition</b>                                                                    |
|--------------|--------------------|--------------------------------------------------------------------------------------|
| <b>0</b>     |                    | Absence of the indicated symptom                                                     |
| <b>1</b>     | Mild               | Awareness of a symptom but the symptom is easily tolerated                           |
| <b>2</b>     | Moderate           | Discomfort enough to cause interference with usual activity                          |
| <b>3</b>     | Severe             | Incapacitating; unable to perform usual activities; requires absenteeism or bed rest |

**Table S1. Assessment of severity.** Criteria for assessment of intensity of systemic adverse events.
