# Supplementary material
Source: PubMed Central journal article supplement (PMC3242658)
Supplement: mt2011176x11.pdf [file mt2011176x11.pdf]

**(a) Swelling**

| Grade | Diameter (mm) |
|-------|---------------|
| 0     | 0             |
| 1     | 1 - 50        |
| 2     | >50 – 100     |
| 3     | > 100         |

**(b) Erythema**

| Grade | Diameter (mm) |
|-------|---------------|
| 0     | 0             |
| 1     | 1 - 50        |
| 2     | >50 – 100     |
| 3     | > 100         |

**(c) Pain**

| Grade    | Description                                                                                                          |
|----------|----------------------------------------------------------------------------------------------------------------------|
| <b>0</b> | No pain at all                                                                                                       |
| <b>1</b> | Painful to touch, no restriction in movement of arms, able to work, drive, carry heavy objects as normal             |
| <b>2</b> | Painful when limb is moved<br>( <i>i.e.</i> restriction in range of movement in arm, difficulty in carrying objects) |
| <b>3</b> | Severe pain at rest<br>( <i>i.e.</i> unable to use arm due to pain.)                                                 |

**Table S2. Assessment of local AEs.** Specific criteria for severity grading of injection site **(a)** swelling, **(b)** erythema and **(c)** pain.
