# Supplementary material
Source: PubMed Central journal article supplement (PMC3242658)
Supplement: mt2011176x12.pdf [file mt2011176x12.pdf]

| <b>Grade</b> | <b>Description</b>                                 |
|--------------|----------------------------------------------------|
| <b>1</b>     | Recovered                                          |
| <b>2</b>     | Recovered with sequelae                            |
| <b>3</b>     | Died                                               |
| <b>4</b>     | Unknown                                            |
| <b>5</b>     | Ongoing at subject study conclusion (active phase) |

**Table S3. Assessment of outcome.** Outcome of AEs was recorded according to the scale.
