# Supplementary material
Source: PubMed Central journal article supplement (PMC3242658)
Supplement: mt2011176x13.pdf [file mt2011176x13.pdf]

|          |                        |                                                                                                                                                                                                                               |
|----------|------------------------|-------------------------------------------------------------------------------------------------------------------------------------------------------------------------------------------------------------------------------|
| <b>0</b> | <b>No Relationship</b> | No temporal relationship to study product <i>and</i><br>Alternate aetiology (clinical state, environmental or other interventions); <i>and</i><br>Does not follow known pattern of response to study product                  |
| <b>1</b> | <b>Possible</b>        | Reasonable temporal relationship to study product; <i>or</i><br>Event not readily produced by clinical state, environmental or other interventions; <i>or</i><br>Similar pattern of response to that seen with other vaccines |
| <b>2</b> | <b>Probable</b>        | Reasonable temporal relationship to study product; <i>and</i><br>Event not readily produced by clinical state, environment, or other interventions <i>or</i><br>Known pattern of response seen with other vaccines            |
| <b>3</b> | <b>Definite</b>        | Reasonable temporal relationship to study product; <i>and</i><br>Event not readily produced by clinical state, environment, or other interventions; <i>and</i><br>Known pattern of response seen with other vaccines          |

**Table S4. Assessment of relatedness.** Relatedness of AEs with respect to vaccine administration was recorded according to the scale.
