# Supplementary material
Source: PubMed Central journal article supplement (PMC3242658)
Supplement: mt2011176x14.pdf [file mt2011176x14.pdf]

| #   | Sequence              | Pool | #   | Sequence              | Pool |
|-----|-----------------------|------|-----|-----------------------|------|
| 1.1 | MKIIFFLCSFLFFII       | 1    | 55  | EKSNVEVKIKELNYLKTIQD  | W33  |
| 1.2 | FLCSFLFFIINTQCV       | 1    | 56  | ELNYLKTIQDKLADFKKNNN  | W33  |
| 2   | LFFIINTQCVTHESYQELVK  | 1    | 57  | KLADFKKNNNFVGIADLSTD  | W33  |
| 3   | THESYQELVKKLEALEDAVL  | 1    | 58  | FVGIADLSTDYNHNNLLTKF  | W33  |
| 4   | KLEALEDAVLTGYSLFQKEK  | 1    | 59  | YNHNNLLTKFLSTGMVFENL  | W33  |
| 5   | TGYSLFQKEKMVLNELFDLT  | 1    | 60  | LSTGMVFENLAKTVLSNLLD  | W33  |
| 6   | MVLNELFDLTNHMLTLCDNI  | 3    | 61  | AKTVLSNLLDGNLQGMLNIA  | W33  |
| 7   | NHMLTLCDNIHGFKYLIDGY  | 3    | 62  | GNLQGMLNIAQHQCCKKQIP  | W19  |
| 8   | HGFKYLIDGYEEINELLYKL  | 3    | 63  | QHQCCKKQIPQNSGCFRHL   | W19  |
| 9   | EEINELLYKLNFYFDLLRAK  | 3    | 64  | QNSGCFRHLDEREEWKCLLN  | W19  |
| 10  | NFYFDLLRAKLNDVCANDYC  | 3    | 65  | EREEWKCLLNKQEGDKCVE   | W19  |
| 11  | LNDVCANDYCQIPFNLKIRA  | 3    | 66  | YKQEGDKCVENPNPTCNENN  | W19  |
| 12  | QIPFNLKIRANELDVLKCLV  | 3    | 67  | NPNPTCNENNGGCDADAKCT  | W19  |
| 13  | NELDVLKCLVFGYRKPLDNI  | 3    | 68  | GGCDADAKCTEEDSGSNGKK  | W19  |
| 14  | FGYRKPLDNIKDNVGMEDY   | 3    | 69  | EEDSGSNGKKITCECTKPDS  | W19  |
| 15  | KDNVGMEDYIKKNKTTIAN   | 3    | 70  | ITCECTKPDSYPLFDGIFCS  | W19  |
| 16  | IKKNKTTIANINELIEGSKK  | 3    | 71  | YPLFDGIFCSSSNGGGPGGG  | W19  |
| 17  | INELIEGSKKTIDQKNADN   | 3    | 72  | SSNGGGPGGGDQVVTGEAIS  | M33  |
| 18  | TIDQKNADNEEGKKKLYQA   | 3    | 73  | VTMDNILSGFENEYDVIYK   | M33  |
| 19  | EKGKKLYQAQYDLSIYNKQ   | 3    | 74  | DQVVTGEAISVTMDNILSGF  | M33  |
| 20  | QYDLSIYNKQLEEAHNLISV  | 3    | 75  | ENEYDVIYKPLAGVYRSLK   | M33  |
| 21  | LEEAHNLISVLEKRIDTLKK  | 3    | 76  | PLAGVYRSLKKQIEKNIFTF  | M33  |
| 22  | LEKRIDTLKKNENIKIKEIA  | 3    | 77  | KQIEKNIFTFNLNLNDILNS  | M33  |
| 23  | NENIKIKEIAKTIKFNIDSL  | 5    | 78  | NLNLNDILNSRLKKRKYFLD  | M33  |
| 24  | KTIKFNIDSLFTDPLELEYY  | 5    | 79  | RLKKRKYFLDVLES DLMQFK | M33  |
| 25  | FTDPLELEYYLREKNKKMQI  | 5    | 80  | VLES DLMQFKHISSNEYIIE | M33  |
| 26  | LREKNKKMQIKKLTLLKEQL  | 12   | 81  | HISSNEYIIEDSFKLLNSEQ  | M33  |
| 27  | KKLTLLKEQLESKLNLSLNNP | 12   | 82  | DSFKLLNSEQKNTLLKSYKY  | M33  |
| 28  | ESKLNLSLNNPHNVLQNFVVF | 12   | 83  | KNTLLKSYKYIKESVENDIK  | M33  |
| 29  | HNVLQNFVVFVNKKKEAIEA  | 12   | 84  | IKESVENDIKFAQEGISYYE  | M33  |
| 30  | FNKKKEAIEAETENTLENTK  | 12   | 85  | FAQEGISYYEKVLAKYKDDL  | M33  |
| 31  | ETENTLENTKILLKHYKGLV  | 12   | 86  | KVLAKYKDDLESIKKVIKEE  | M33  |
| 32  | ILLKHYKGLVKYYNGESSPL  | 12   | 87  | ESIKKVIKEEKEKFPSSPPT  | M33  |
| 33  | KYYNGESSPLKTLSEVSIQT  | 12   | 88  | KEKFPSSPPTTPPSPAKTDE  | M33  |
| 34  | KTLSEVSIQTEDNYANLEGQ  | 12   | 89  | TPPSPAKTDEQKKESKFLPF  | M33  |
| 35  | EDNYANLEGQVVTGEAVTPS  | W33  | 90  | QKKESKFLPFLTNIETLYNN  | M33  |
| 36  | VVTGEAVTPSVIDNILSKIE  | W33  | 91  | LTNIETLYNNLVNKIDDYLI  | M33  |
| 37  | VIDNILSKIENEYEVLYLKP  | W33  | 92  | LVNKIDDYLINLKAKINDCN  | M33  |
| 38  | NEYEVLYLKPPLAGVYRSLKK | W33  | 93  | NLKAKINDCNVEKDEAHVKI  | M33  |
| 39  | LAGVYRSLKKQLENNVMTFN  | W33  | 94  | VEKDEAHVKITKLSDLKAID  | M33  |
| 40  | QLENNVMTFNVNVKDILNSR  | W33  | 95  | TKLSDLKAIDDKIDLFKNPY  | M33  |
| 41  | VNVKDILNSRFNKRENFKNV  | W33  | 96  | DKIDLFKNPYDFEAIKKLIN  | M33  |
| 42  | FNKRENFKNVLES DLIPYKD | W33  | 97  | DFEAIKKLINDDTKKDMLGK  | M33  |
| 43  | LES DLIPYKDLTSSNYVVKD | W33  | 98  | DDTKKDMLGKLLSTGLVQNF  | M33  |
| 44  | LTSSNYVVKDPYKFLNKEKR  | W33  | 99  | LLSTGLVQNFNTIISKLIE   | M33  |
| 45  | PYKFLNKEKRDKFLSSYNYI  | W33  | 100 | PNTIISKLIEGKFQDMLNIA  | M33  |
| 46  | DKFLSSYNYIKDSIDTDINF  | W33  | 101 | GKFQDMLNIAQHQCCKKQIP  | M19  |
| 47  | KDSIDTDINFANDVLGYYKI  | W33  | 102 | QHQCCKKQIPENSGCFRHL   | M19  |
| 48  | ANDVLGYYKILSEKYKSDLD  | W33  | 103 | ENSGCFRHLDEREEWKCLLN  | M19  |

|    |                       |     |       |                      |     |
|----|-----------------------|-----|-------|----------------------|-----|
| 49 | LSEKYKSDLDSIKKYINDKQ  | W33 | 106   | NPNTCNENNGGCDADATCT  | M19 |
| 50 | SIKKYINDKQGENEKYLPFL  | W33 | 107   | GGCDADATCTEEDSGSSRKK | M19 |
| 51 | GENEKYLPFLNNIETLYKTV  | W33 | 108   | EEDSGSSRKKITCECTKPDS | M19 |
| 52 | NNIETLYKTVNDKIDLFVIH  | W33 | 109.1 | YPLFDGIFCSSSNI       | M19 |
| 53 | NDKIDLFVIHLEAKVLNYTY  | W33 | 109.2 | GIFCSSSNIILYSFI      | M19 |
| 54 | LEAKVLNYTYEKS NVEVKIK | W33 |       |                      |     |

**Table S5. MSP1 overlapping peptides.** 20mer peptides overlapping by 10 aa were generated for the whole of the MSP1 vaccine insert present in the ChAd63 and MVA vaccines (except for four peptides which were made as 15mers overlapping by 10aa – peptides #1.1, 1.2, 109.1 and 109.2). Peptide sequences are shown, and pools indicated: 1 = sequence for Block 1 ( $n = 6$ ); 3 = sequence for Block 3 ( $n = 17$ ); 5 = sequence for Block 5 ( $n = 3$ ); 12 = sequence for Block 12 ( $n = 9$ ); W33 = sequence for Wellcome allele MSP1<sub>33</sub> / Block 16 ( $n = 27$ ); W19 = Wellcome allele MSP1<sub>19</sub> / Block 17 ( $n = 10$ ); M33 = sequence for MAD20 allele MSP1<sub>33</sub> / Block 16 ( $n = 29$ ); and M19 = MAD20 allele MSP1<sub>19</sub> / Block 17 excluding those peptide sequences duplicated in W19 ( $n = 8$ ). Peptides spanning the fusion sites of each block of sequence, to enable assessment of responses to artificial epitopes present in the vaccine construct but not the native MSP1 protein, were used in a subsequent trial and will be reported separately (Sheehy SH and Elias SC et al., manuscript in preparation).
