# Supplementary material
Source: PubMed Central journal article supplement (PMC3242658)

# Figure S1

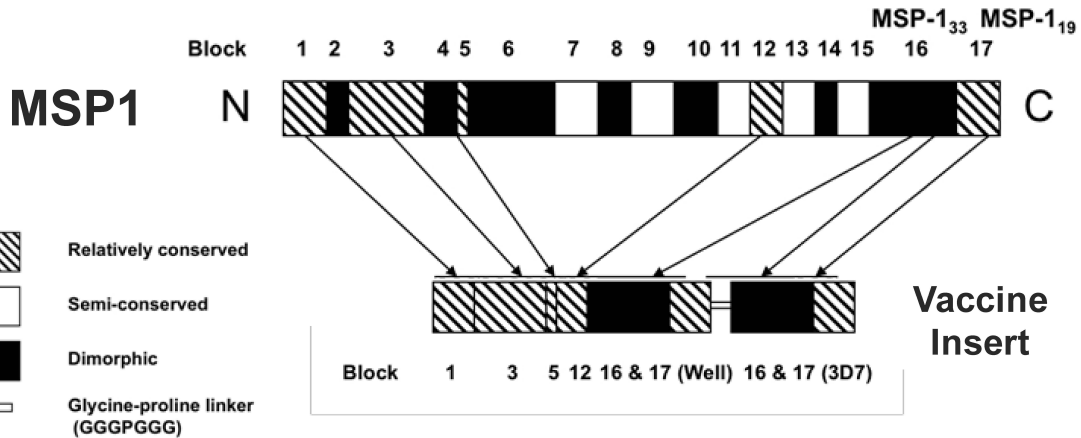

Supplement: mt2011176x1.pdf [file mt2011176x1.pdf]

# Figure S2

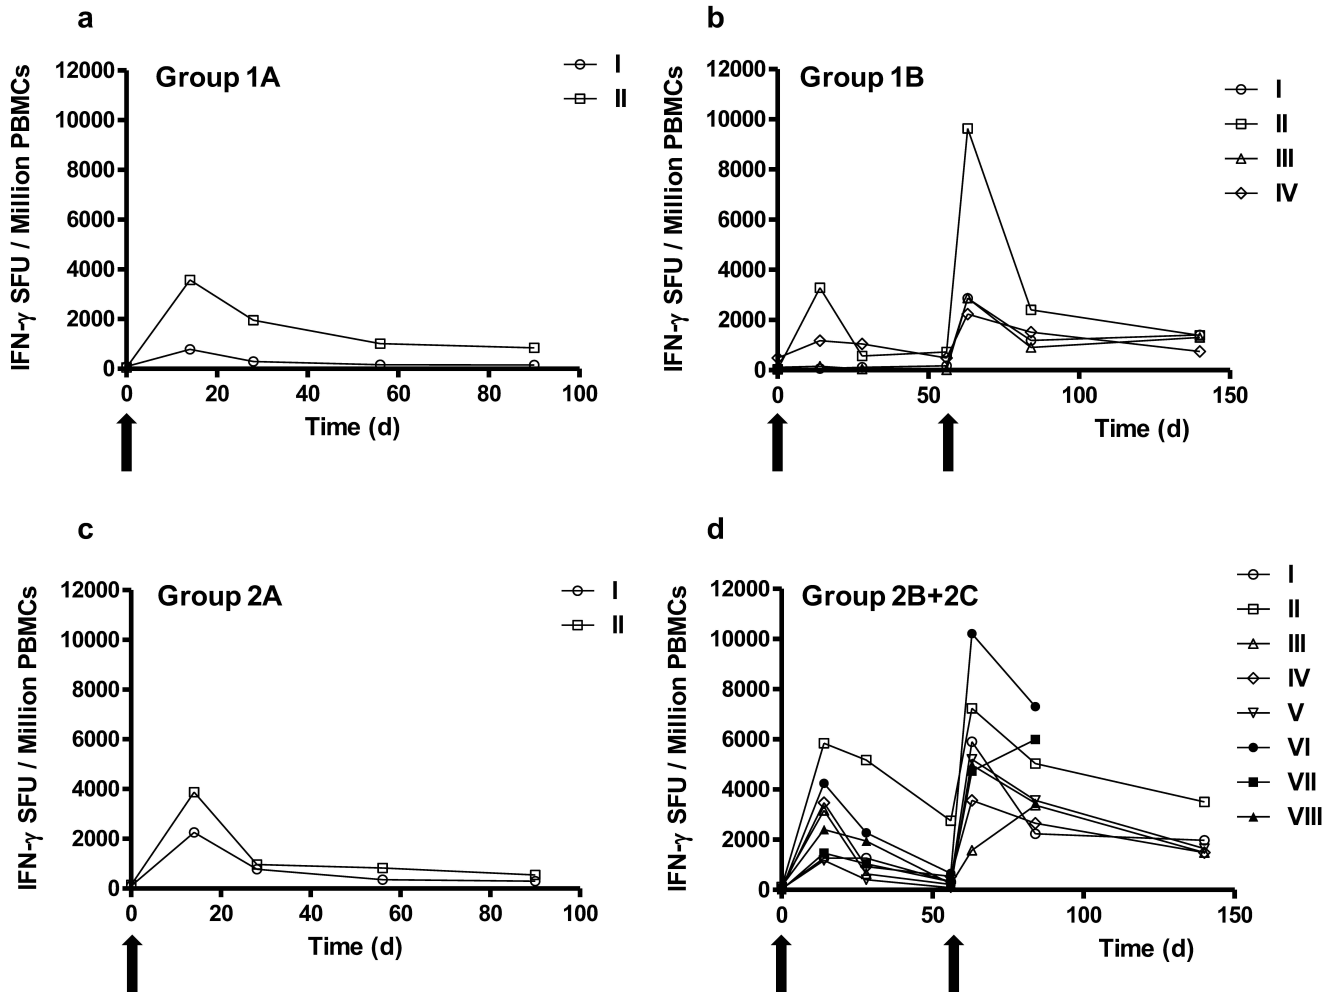

Supplement: mt2011176x2.pdf [file mt2011176x2.pdf]

# Figure S3

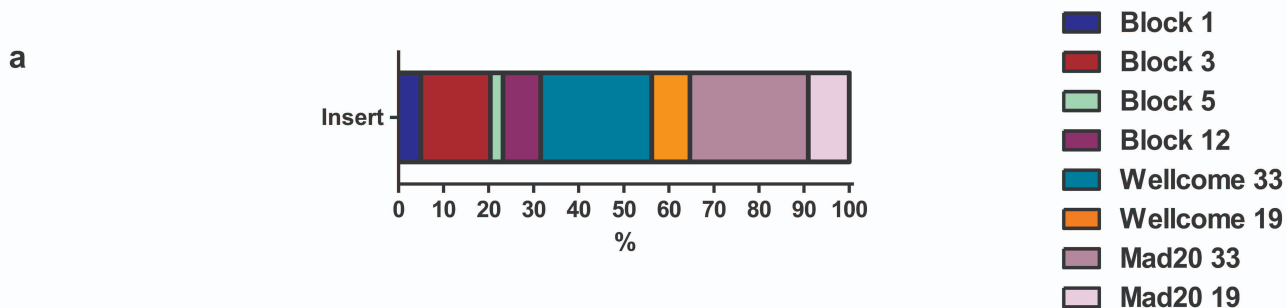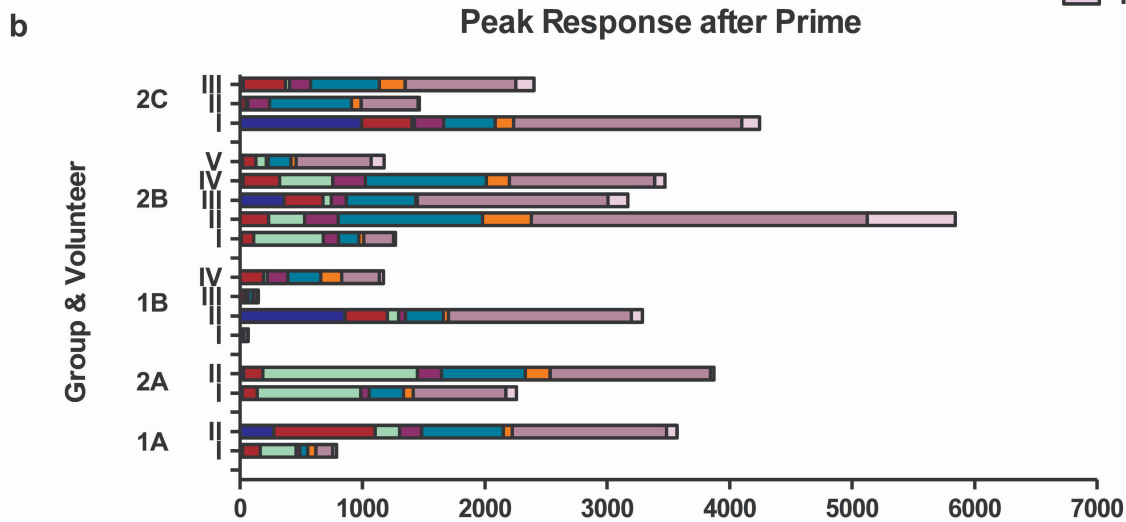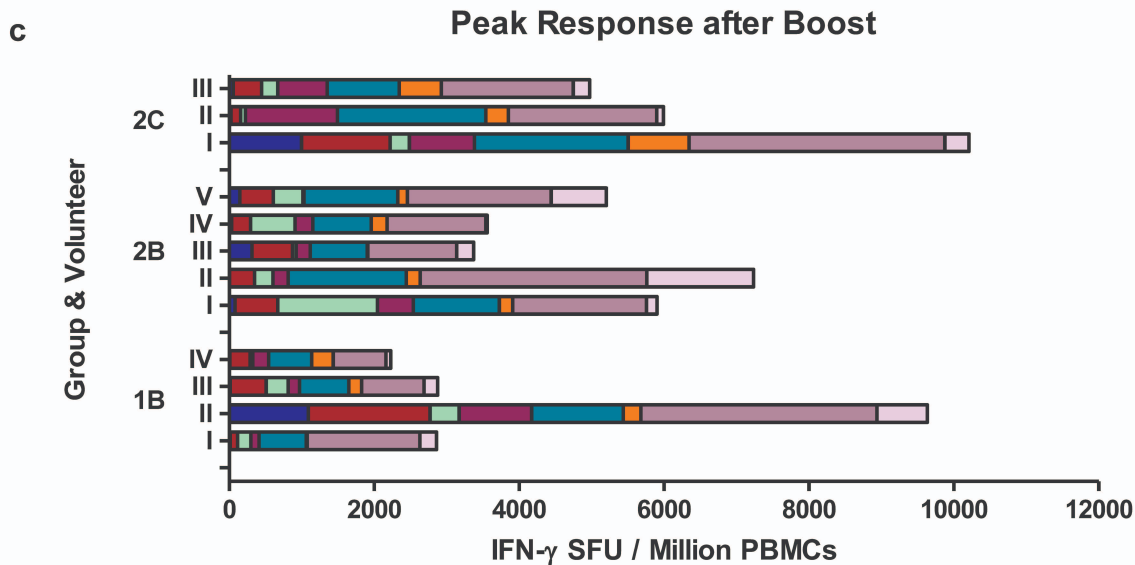

Supplement: mt2011176x3.pdf [file mt2011176x3.pdf]

# Figure S4

a

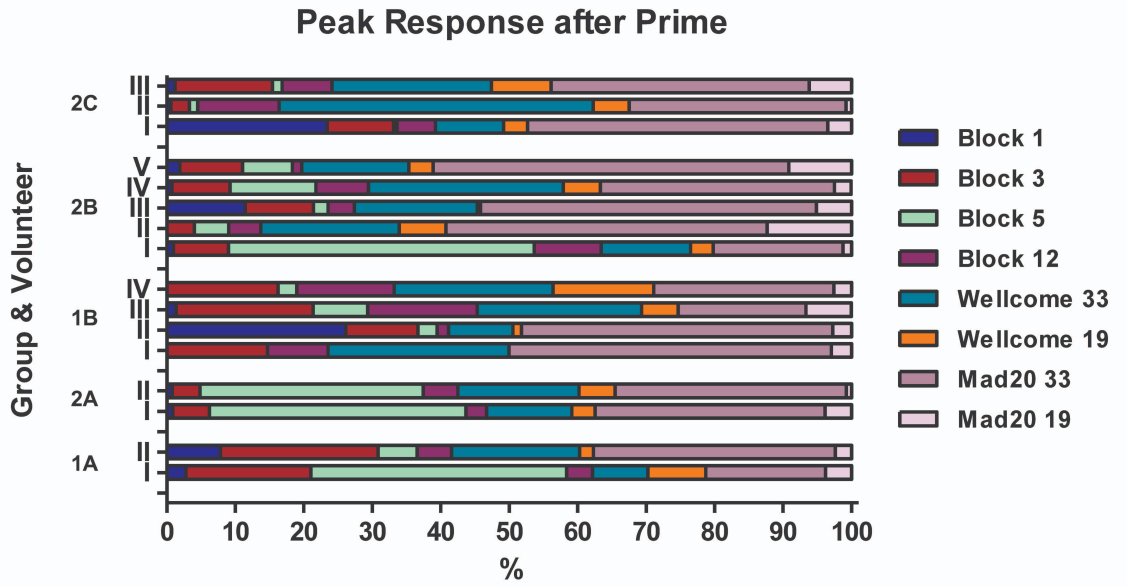

b

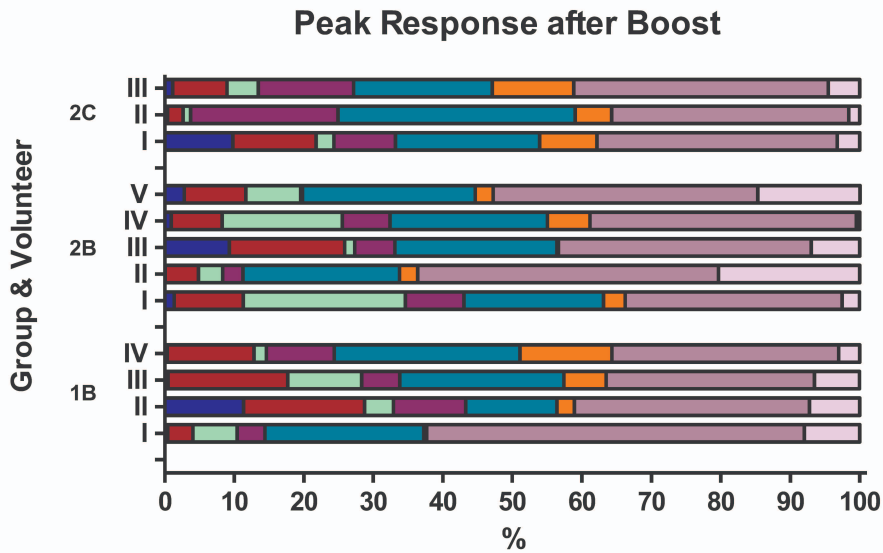

c

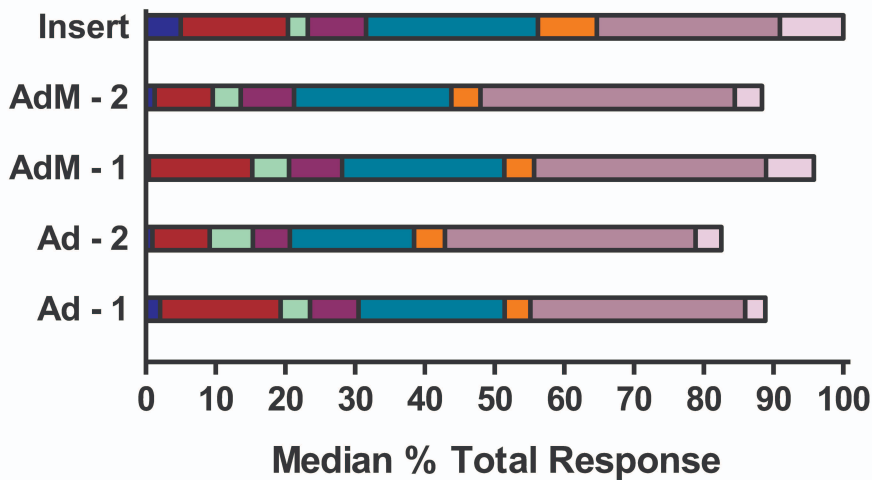

Supplement: mt2011176x4.pdf [file mt2011176x4.pdf]

Figure S5

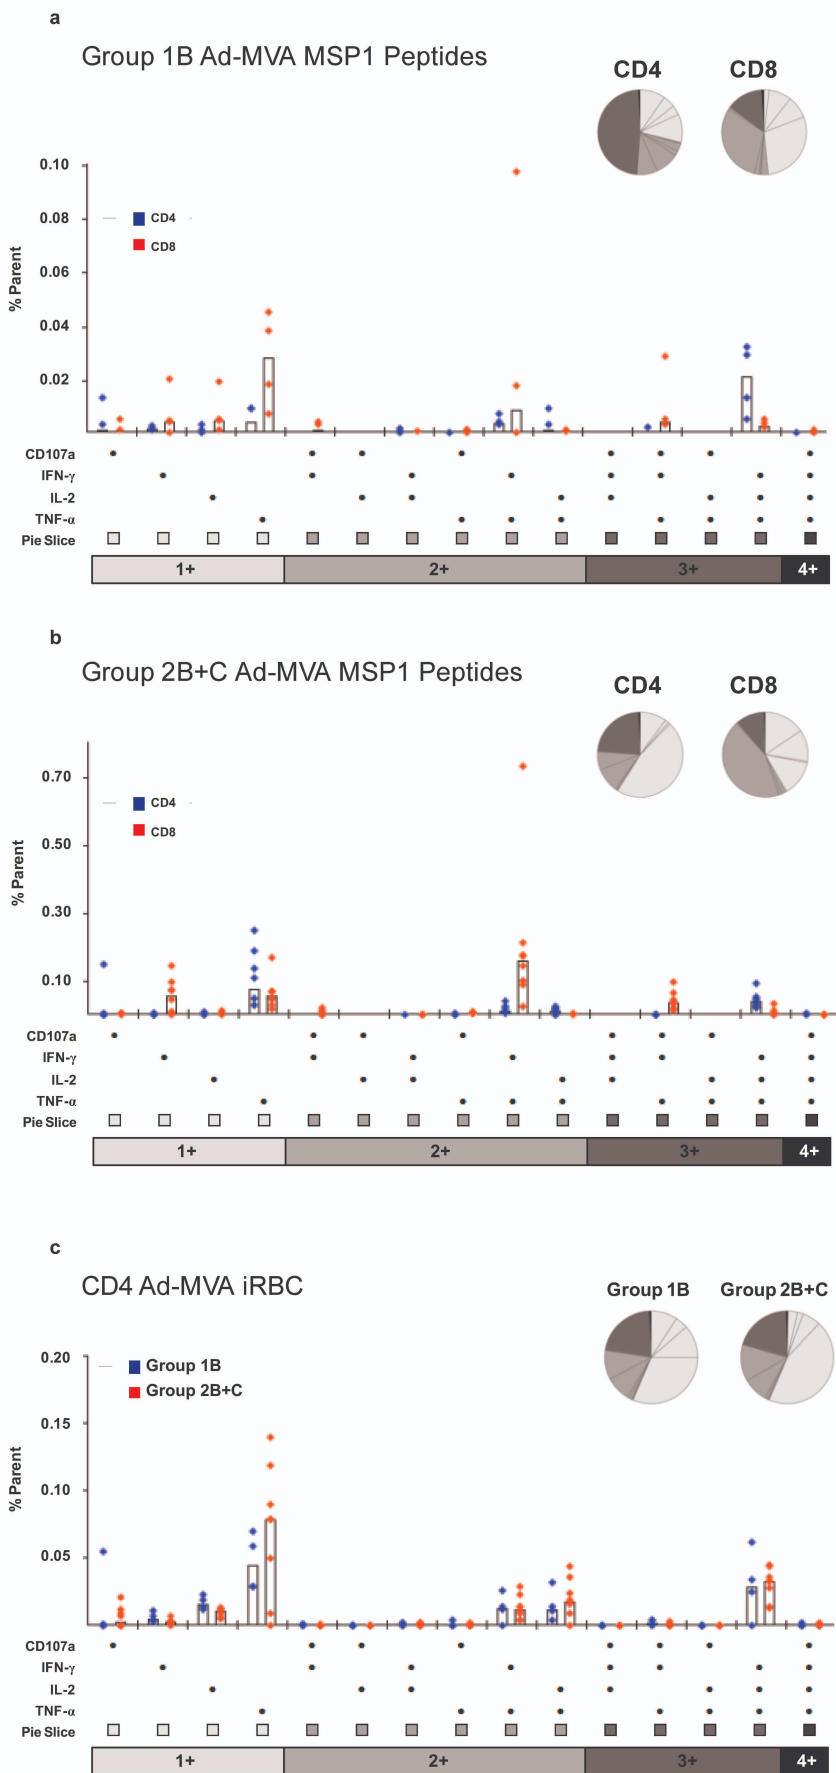

Supplement: mt2011176x5.pdf [file mt2011176x5.pdf]

# Figure S6

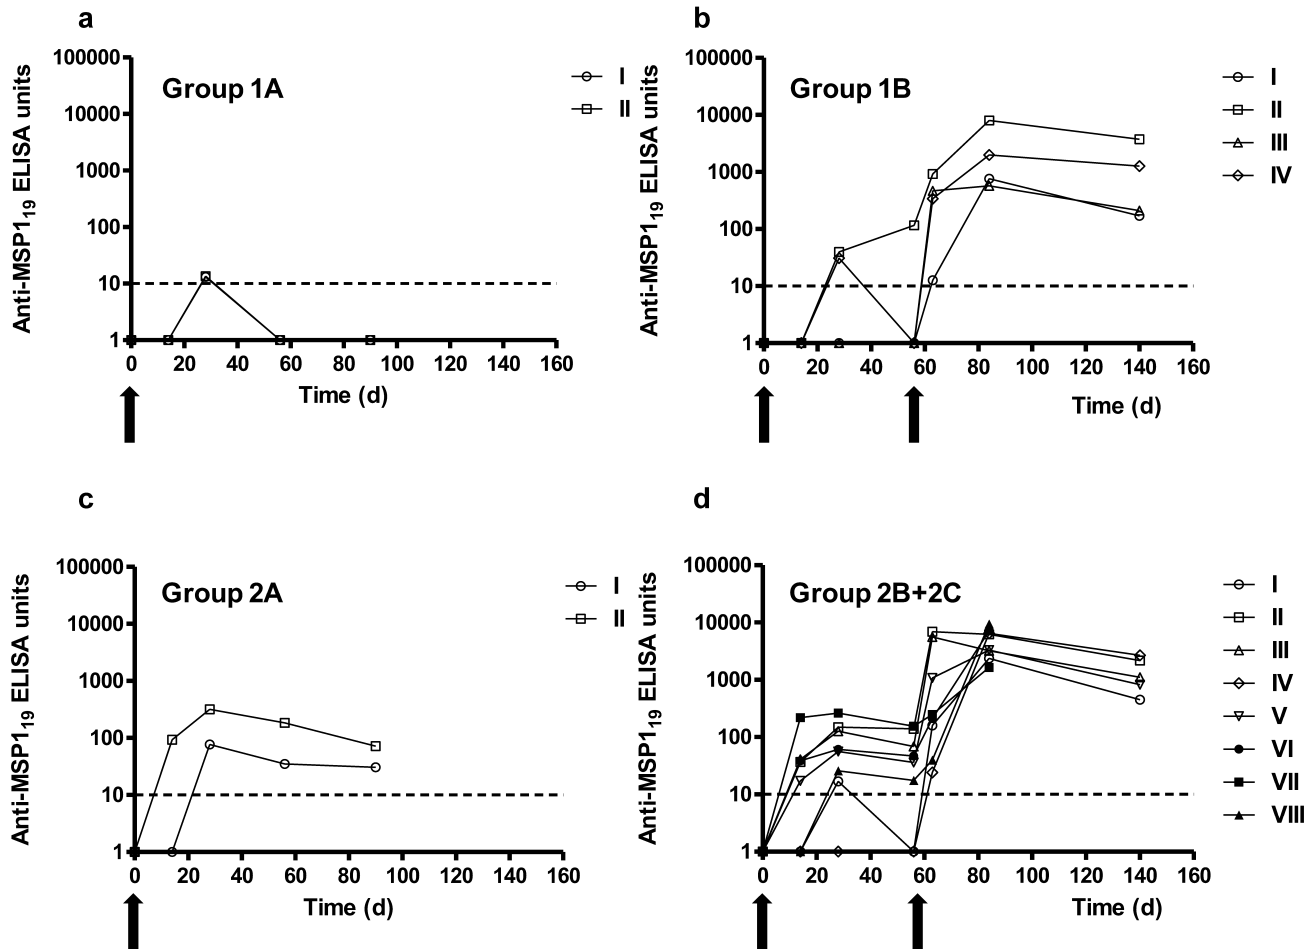

Supplement: mt2011176x6.pdf [file mt2011176x6.pdf]

# Figure S7

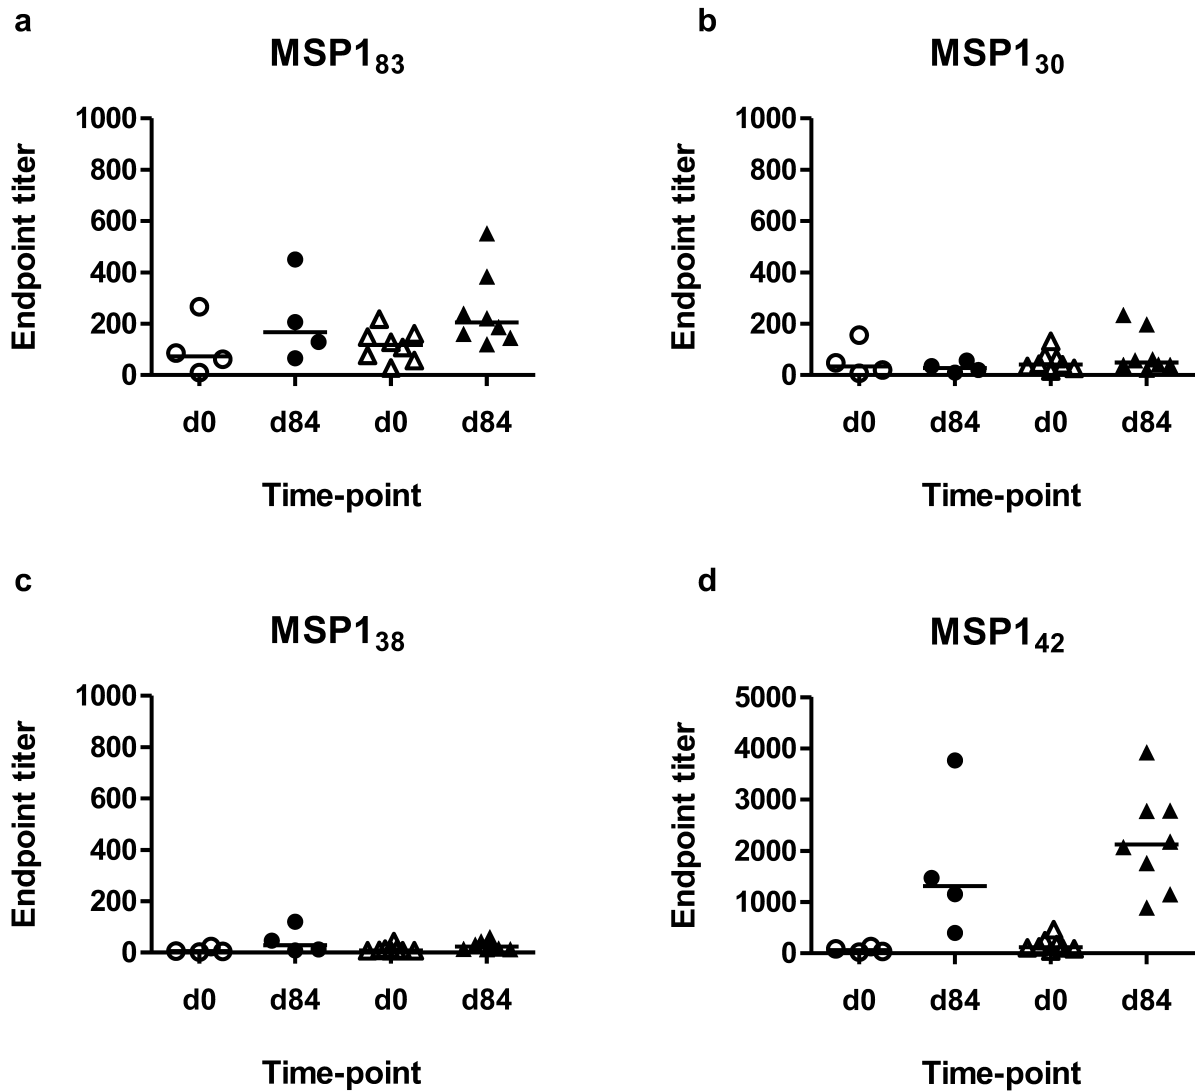

Supplement: mt2011176x7.pdf [file mt2011176x7.pdf]

# Figure S8

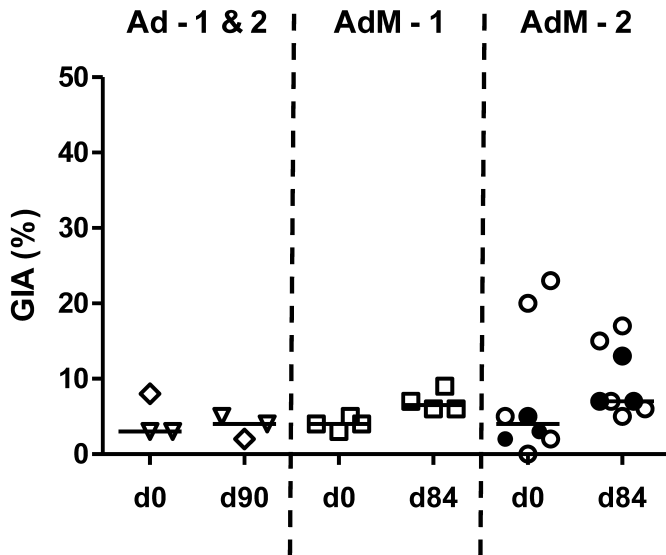

Supplement: mt2011176x8.pdf [file mt2011176x8.pdf]

**Figure S9**

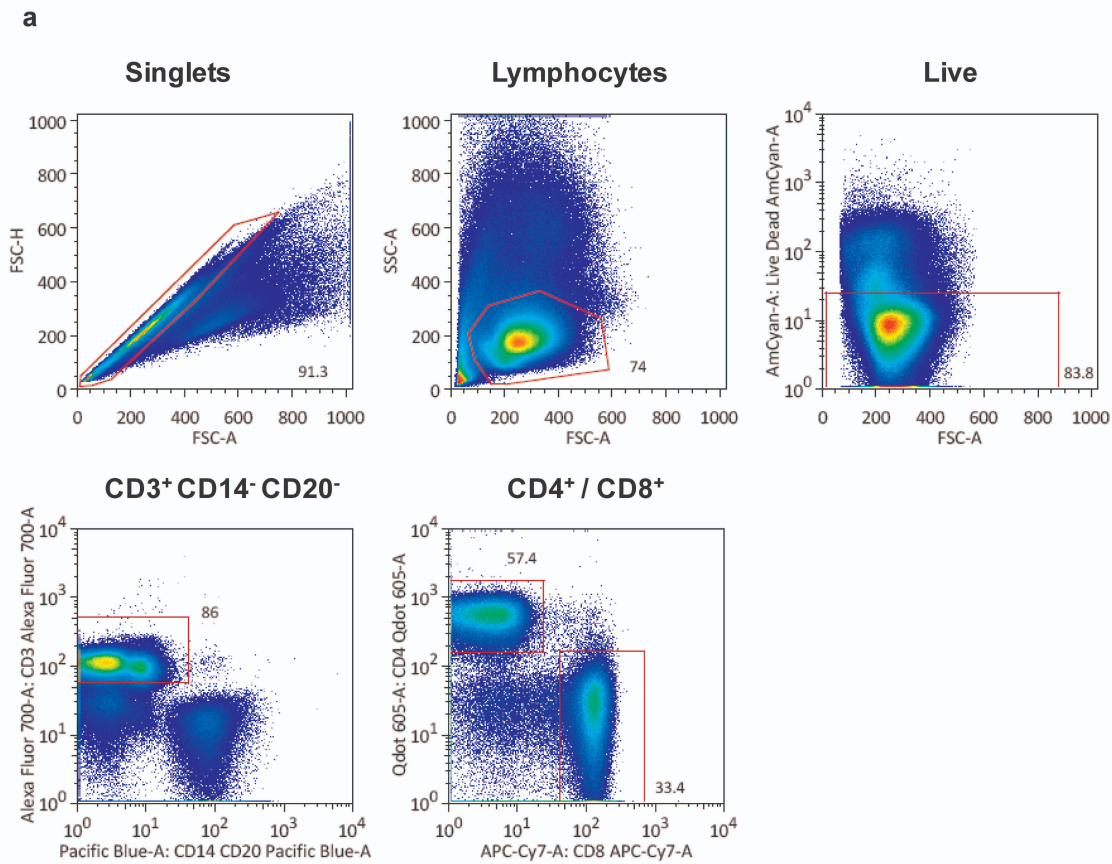

**b** **CD4<sup>+</sup> cells**

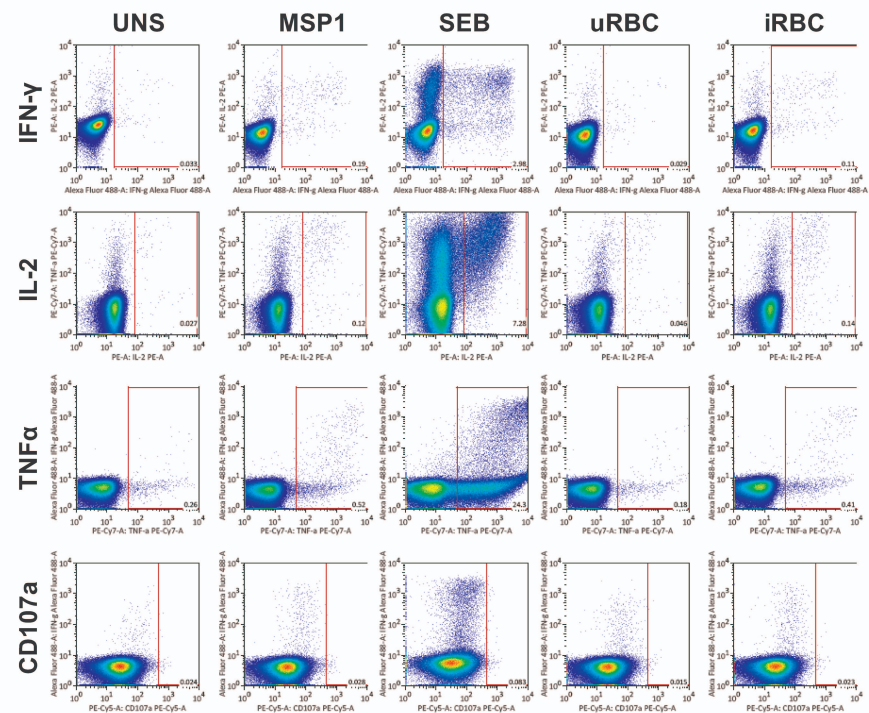

**c** **CD8<sup>+</sup> cells**

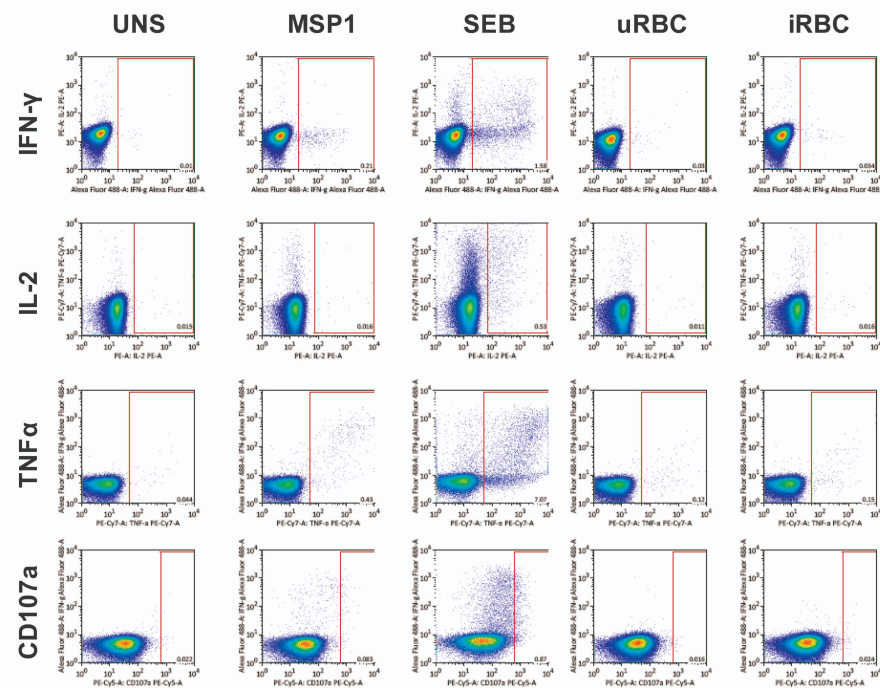

Supplement: mt2011176x9.pdf [file mt2011176x9.pdf]
